# Supplementary material for: On unifying carbonate rheology
Source: Copernicus journal article supplement (doi:10.5194/se-16-877-2025), 2025-09-29
Supplement: Supplementary file 1 [file se-16-877-2025-supplement.zip]

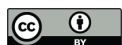

## *Supplement of*

# **On unifying carbonate rheology**

**James Gilgannon and Marco Herwegh**

*Correspondence to:* James Gilgannon ([james.gilgannon@glasgow.ac.uk](mailto:james.gilgannon@glasgow.ac.uk))

- [se-16-877-2025-supplement-title-page.pdf](#)
- [supp](#)
  - [READ\\_ME.txt](#)
  - [carbonate\\_experimental\\_data\\_compilation.csv](#)
  - [mg\\_conversion.py](#)

The copyright of individual parts of the supplement might differ from the article licence.
